# Supplementary material for: Modification of a polymer gate insulator by zirconium oxide doping for low temperature, high performance indium zinc oxide transistors
Source: Royal Society of Chemistry journal article supplement (doi:10.1039/c4ra08548e), 2014-09-05
Supplement: c4ra08548e1.pdf [file c4ra08548e1.pdf]

Supporting Information

# Modification of a polymer gate insulator by zirconium oxide doping for low temperature, high performance indium zinc oxide transistors

*Byeong-Geun Son<sup>1</sup>, So Yeon Je<sup>1</sup>, Hyo Jin Kim<sup>1</sup> and Jae Kyeong Jeong<sup>1\*</sup>*

<sup>1</sup>Department of Materials Science and Engineering, Inha University, Incheon 402-751,

Republic of Korea

AUTHOR EMAIL ADDRESS: J. K. Jeong (jkjeong@inha.ac.kr)

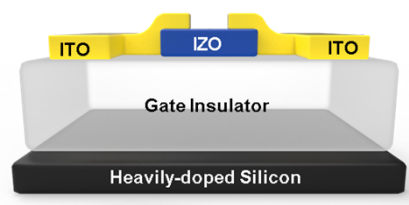

(a)

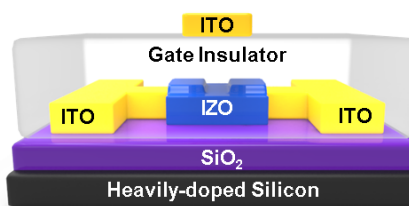

(b)

**Figure S1.** Schematic cross-sections of the IZO TFTs with (a) bottom gate and (b) top gate structure.
